# Supplementary material
Source: Springer Nature journal article supplement (https://www.springermedizin.de/resource/supplementary/13075_2009_2756_MOESM5_ESM.pdf/9692820)

NS Beclin NS Beclin : siRNA

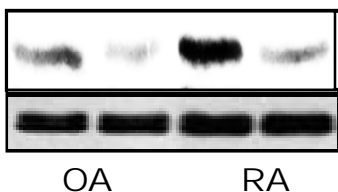

(a)

(b)

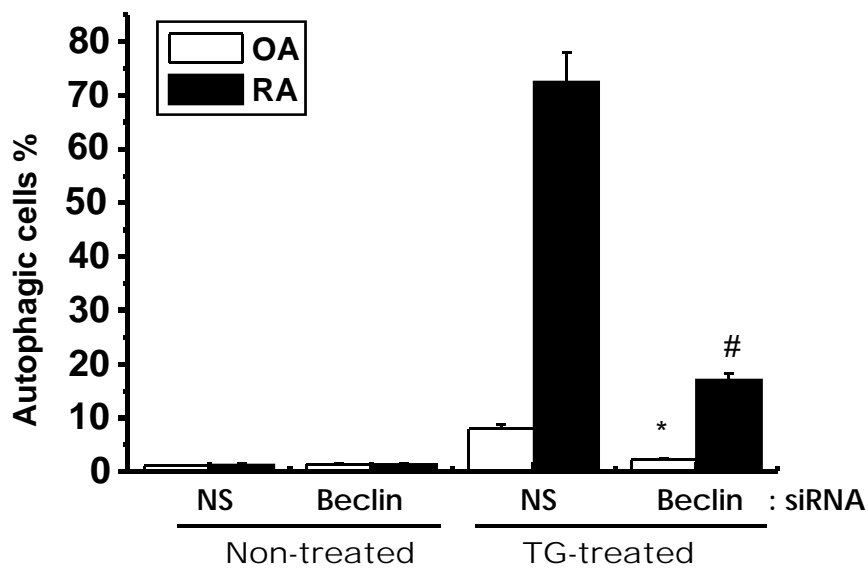

(c)

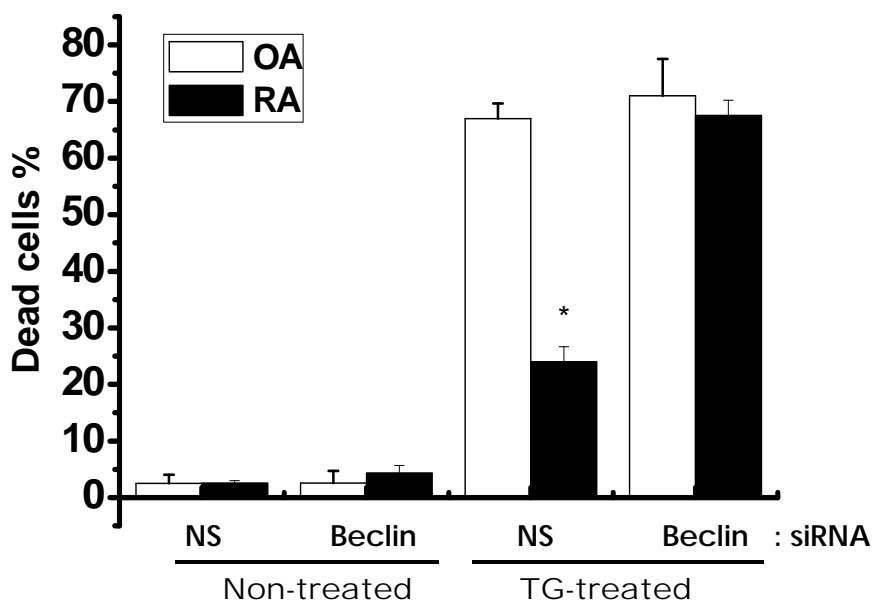

Supplement: MOESM5 [file 9692820]
